# Supplementary material for: Simulation of ozone-vegetation coupling and feedback in China using multiple ozone damage schemes
Source: Copernicus journal article supplement (doi:10.5194/egusphere-2023-2149), 2023-11-01
Supplement: Supplementary file 1 [file egusphere-2023-2149-supplement.pdf]

# Supporting Information

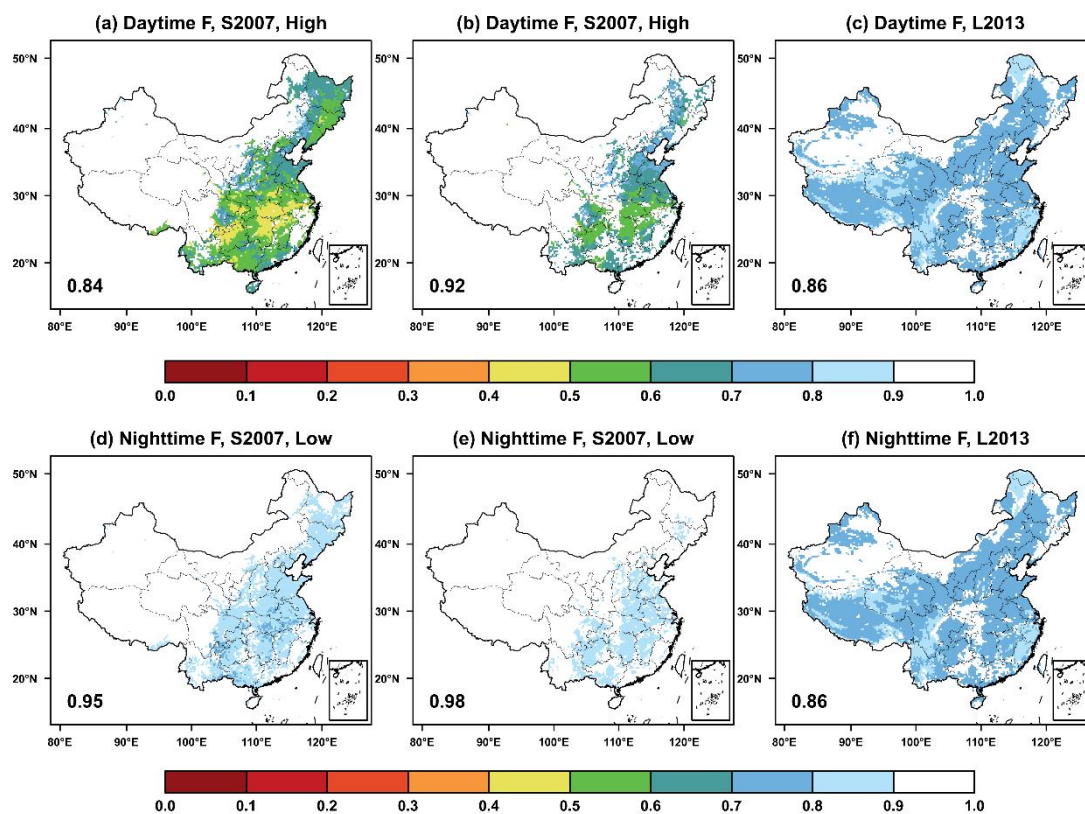

**Figure S1** The undamaged fraction by  $O_3$  ( $F$ ) predicted with the S2007 scheme using (a, d) high and (b, e) low sensitivities or the (c, f) L2013 scheme. The area-weighted percentage changes are shown in the lower left corner.
