# Supplementary material for: Simulation of ozone-vegetation coupling and feedback in China using multiple ozone damage schemes
Source: Copernicus journal article supplement (doi:10.5194/egusphere-2023-2149), 2023-11-01
Supplement: Supplementary file [file egusphere-2023-2149-AC2-supplement.pdf]

## Response to Comments of Reviewer #1

Manuscript number: egusphere-2023-2149

Authors: Jiachen Cao, Xu Yue and Mingrui Ma

Title: Simulation of ozone-vegetation coupling and feedback in China using multiple ozone damage schemes

We are grateful to the referee for his/her time and energy in providing helpful comments and guidance that have improved the manuscript. In this document, we describe how we have addressed the reviewer's comments. Referee comments are shown in black and author responses are shown in blue text.

The authors examined the meteorological and air quality feedback of O<sub>3</sub> damage to vegetation by coupling WRF-Chem with two O<sub>3</sub> damage schemes. This reviewer has a few questions.

First, S2007 seems to calculate instantaneous (for WRF-Chem's model integration time steps or hourly) values of the undamaged fraction F, whereas L2013 calculates the ozone damage ratio for the entire growing season. So, was one constant L2013-calculated, plant-specific, O<sub>3</sub> damage ratio applied throughout the whole simulation period, whereas S2007-calculated O<sub>3</sub> damage ratios were time-dependent, when the schemes were coupled with WRF-Chem?

*Response:* As mentioned by the referee, the ozone damage calculated by the S2007 scheme is related to instantaneous excessive ozone flux ( $dFO_3$ ), while the ozone damage calculated by the L2013 scheme is related to the cumulative ozone uptake flux (CUO). As shown in Figure R1, both CUO and  $dFO_3$  vary with time. The value of CUO increases month by month, reaching a maximum in August. In contrast,  $dFO_3$  is affected by instantaneous O<sub>3</sub> concentration, which peaks in July, leading to highest  $dFO_3$  in July.

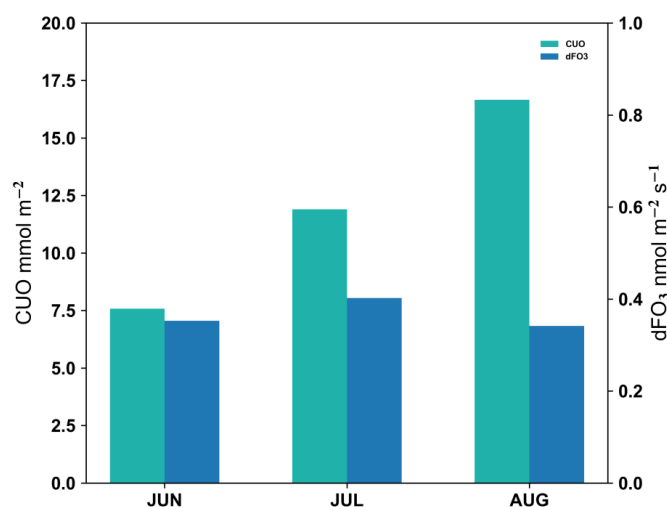

**Figure R1** Monthly mean CUO and  $dFO_3$  calculated for L2013 and S2007 schemes,

respectively. Here  $dFO_3 = \max\{f_{O_3} - y_{PFT}, 0\}$  in equation (3) of main text.

Second, the way the manuscript was written did not show the distinction between sunlit and sunshade in S2007- and L2013-calculated O<sub>3</sub> damage ratios, which leads to the question how the ratios were applied to NOAA-MP. This leads to the next question. Why were L2013-calculated sunlit and sunshade O<sub>3</sub> damage values for both photosynthesis and stomatal conductance were almost the same, whereas S2007-calculated ones showed such a contrast?

*Response:* In supplementary material, we added Text S1 to explain how we distinguish O<sub>3</sub> damages to sunlit and shaded leaves:

“In NOAA-MP, stomatal resistance is calculated separately for sunlit and shaded leaves. Therefore, the undamaged fraction  $F_{(sunlit/shaded)}$  in S2007 is dependent on the sensitivity parameter  $a_{PFT}$  and excessive area-based stomatal O<sub>3</sub> flux, which is calculated as the difference between  $f_{O_3(sunlit/shaded)}$  and threshold  $y_{PFT}$ :

$$F = 1 - a_{PFT} \times \max\{f_{O_3(sunlit/shaded)} - y_{PFT}, 0\} \quad (1)$$

The stomatal O<sub>3</sub> flux  $f_{O_3(sunlit/shaded)}$  is calculated as:

$$f_{O_3(sunlit/shaded)} = \frac{[O_3]}{r_a + k_{O_3} \cdot r_{s(sunlit/shaded)}} \quad (2)$$

where  $r_{s(sunlit/shaded)}$  represents stomatal resistance ( $s\ m^{-1}$ ) for sunlit/shaded leaves.

For the L2013 scheme, the leaf-level CUO for sunlit and sunshade ( $mmol\ m^{-2}$ ) over the growing season is calculated as follows:

$$CUO_{(sunlit/shaded)} = \sum(k_{O_3}/r_{s(sunlit/shaded)} + 1/r_a) \times [O_3] \quad (3)$$

$$F_{pO_3(sunlit/shaded)} = a_p \times CUO_{(sunlit/shaded)} + b_p \quad (4)$$

$$F_{cO_3(sunlit/shaded)} = a_c \times CUO_{(sunlit/shaded)} + b_c \quad (5)$$

where  $F_{pO_3(sunlit/shaded)}$  and  $F_{cO_3(sunlit/shaded)}$  are the damage ratios of photosynthesis and stomatal conductance for sunlit/shaded leaves, respectively.”

The main reason why in the L2013 scheme, the sunlit and shaded leaves showed very similar damages for photosynthesis and stomatal conductance is that the L2013 scheme employed  $a_p=0$  or  $a_c=0$  for many PFTs (Table 2). In this case, the damages are independent of CUO which is different between sunlit and shaded leaves. Even for PFTs with non-zero sensitivities, such as grassland and cropland, the values of  $a_p$  and  $a_c$  are too low that the damaging ratio is mainly determined by  $b_p$  or  $b_c$ . In the revised paper, we clarified as follows: “In contrast, the L2013 scheme depends on the accumulated O<sub>3</sub> flux and assumes constant damages for some PFTs (Table 2), resulting in reductions of

photosynthesis even at low  $O_3$  concentrations. Consequently, we found limited differences in the  $O_3$  damages between sunlit (Figure 2c) and shaded (Figure 2f) leaves with L2013 scheme.” (Lines 307-311)

Third, isn't Eq. 5 supposed to be the integration of Eq. 4 according to its definition?

*Response:* By theory the accumulative flux (Eq. 5) should be the integration of instantaneous flux (Eq. 4). In practice, Eq 4 was used in the S2007 scheme while Eq. 5 was used in L2013 scheme with some differences. We maintained such differences because  $O_3$  sensitivity parameters were derived based on the corresponding  $O_3$  stomatal fluxes.
